# Supplementary material for: Appraisal of Flood Susceptibility of Hooghly basin, India using Shannon Entropy (SE) and Fuzzy Analytical Hierarchy Process (FAHP)
Source: Research Square preprint supplement (doi:10.21203/rs.3.rs-3554111/v1), 2023-11-08
Supplement: Supplementary file 1 [file 03b4414d0a8296c9f10b17c3.docx]

**Table 1** Details of the database considered for flood susceptibility

| **Factors** | **Measurement** | **Details** | **Web links/Source** |
| --- | --- | --- | --- |
| Flood inventory map (location of flooded areas) | Vector (1:25000) | Flood locations (394) were identified during 2020-2021 from BHUVAN disaster services managed by Indian Space Research Organization (ISRO) and National Remote Sensing Centre (NRSC). 70/30 ratio was considered to train (276) and test (118) the susceptibility models. | https://bhuvan-app1.nrsc.gov.in/bhuvandisaster/ |
| Drainage density | Raster (m/km²) | Vector river network converted from raster (15 arc second) HydroRIVERS from HydroSHEDS | <https://www.hydrosheds.org/products> |
| Elevation | Raster (30m) | Shuttle Radar Topography Mission (SRTM) digital elevation model (DEM), 23 September 2014 | https://earthexplorer.usgs.gov/ |
| LULC | Raster (10m) | ESRI LULC layer (2021) | https://earthexplorer.usgs.gov/ |
| NDBI | Raster (30m) | Landsat 8 OLI, 25 April - 21 December 2021, 1 to 7 bands (Level 2) | https://earthexplorer.usgs.gov/ |
| NDVI | Raster (30m) | Landsat 8 OLI, 25 April - 21 December 2021, 1 to 7 bands (Level 2) | https://earthexplorer.usgs.gov/ |
| NDWI | Raster (30m) | Landsat 8 OLI, 25 April - 21 December 2021, 1 to 7 bands (Level 2) | https://earthexplorer.usgs.gov/ |
| Population | Raster (2.5 arc-minutes) | Gridded Population of the World (GPW), v3, Socioeconomic Data and Applications Center" (SEDAC), NASA, 2020 | https://sedac.ciesin.columbia.edu/ |
| Rainfall | Raster (0.25º×0.25º) | Average annual rainfall. Indian Meteorological Department (IMD) gridded rainfall data | https://www.imdpune.gov.in/cmpg/Griddata/Rainfall_25_NetCDF.html |
| Distance to rivers | Raster (30m) | Euclidean distance calculated from vector river network converted from raster (15 arc second) HydroRIVERS from HydroSHEDS | https://earthexplorer.usgs.gov/ |
| Slope | Raster (30m) | Shuttle Radar Topography Mission (SRTM) digital elevation model (DEM) (30m) | https://earthexplorer.usgs.gov/ |
| Stream Power Index (SPI) | Raster (30m) | Shuttle Radar Topography Mission (SRTM) digital elevation model (DEM), 23 September 2014 | https://earthexplorer.usgs.gov/ |
| Topographic Wetness Index (TWI) | Raster (30m) | Shuttle Radar Topography Mission (SRTM) digital elevation model (DEM), 23 September 2014 | https://earthexplorer.usgs.gov/ |
