# Supplementary material for: Appraisal of Flood Susceptibility of Hooghly basin, India using Shannon Entropy (SE) and Fuzzy Analytical Hierarchy Process (FAHP)
Source: Research Square preprint supplement (doi:10.21203/rs.3.rs-3554111/v1), 2023-11-08
Supplement: Supplementary file 2 [file 20e6ca13f57354dac3aebd0b.docx]

**Table 3** Fuzzy pairwise comparison matrix for flood susceptibility factors

| **Factors** | **DD** | **Elevation** | **NDBI** | **NDVI** | **NDWI** | **Population** | **Rainfall** | **Distance to river** | **Slope** | **SPI** | **TWI** | **LULC** |
| --- | --- | --- | --- | --- | --- | --- | --- | --- | --- | --- | --- | --- |
| **DD** | 1 | 3 4 5 | 2 3 4 | 2 3 4 | 3 4 5 | 1 2 3 | 3 4 5 | 2 3 4 | 3 4 5 | 2 3 4 | 2 3 4 | 1 2 3 |
| **Elevation** | 1/5 1/4 1/3 | 1 | 1 2 3 | 2 3 4 | 3 4 5 | 1 2 3 | 3 4 5 | 2 3 4 | 4 5 6 | 2 3 4 | 2 3 4 | 2 3 4 |
| **NDBI** | 1/4 1/3 1/2 | 1/3 1/2 1 | 1 | 3 4 5 | 2 3 4 | 4 5 6 | 1 2 3 | 1 2 3 | 2 3 4 | 1 2 3 | 1 2 3 | 2 3 4 |
| **NDVI** | 1/4 1/3 1/2 | 1/4 1/3 1/2 | 1/5 1/4 1/3 | 1 | 2 3 4 | 2 3 4 | 4 5 6 | 2 3 4 | 2 3 4 | 2 3 4 | 2 3 4 | 4 5 6 |
| **NDWI** | 1/5 1/4 1/3 | 1/5 1/4 1/3 | 1/4 1/3 1/2 | 1/4 1/3 1/2 | 1 | 1 2 3 | 2 3 4 | 3 4 5 | 2 3 4 | 2 3 4 | 2 3 4 | 1 2 3 |
| **Population** | 1/3 1/2 1 | 1/3 1/2 1 | 1/6 1/5 1/4 | 1/4 1/3 1/2 | 1/3 1/2 1 | 1 | 2 3 4 | 2 3 4 | 1 2 3 | 1 2 3 | 1 2 3 | 4 5 6 |
| **Rainfall** | 1/5 1/4 1/3 | 1/5 1/4 1/3 | 1/3 1/2 1 | 1/6 1/5 1/4 | 1/4 1/3 1/2 | 1/4 1/3 1/2 | 1 | 3 4 5 | 3 4 5 | 2 3 4 | 2 3 4 | 1 2 3 |
| **Distance to river** | 1/4 1/3 1/2 | 1/4 1/3 1/2 | 1/3 1/2 1 | 1/4 1/3 1/2 | 1/5 1/4 1/3 | 1/4 1/3 1/2 | 1/5 1/4 1/3 | 1 | 2 3 4 | 2 3 4 | 2 3 4 | 3 4 5 |
| **Slope** | 1/5 1/4 1/3 | 1/6 1/5 1/4 | 1/4 1/3 1/2 | 1/4 1/3 1/2 | 1/4 1/3 1/2 | 1/3 1/2 1 | 1/5 1/4 1/3 | 1/4 1/3 1/2 | 1 | 3 4 5 | 3 4 5 | 2 3 4 |
| **SPI** | 1/4 1/3 1/2 | 1/4 1/3 1/2 | 1/3 1/2 1 | 1/4 1/3 1/2 | 1/4 1/3 1/2 | 1/3 1/2 1 | 1/4 1/3 1/2 | 1/4 1/3 1/2 | 1/5 1/4 1/3 | 1 | 3 4 5 | 1 2 3 |
| **TWI** | 1/4 1/3 1/2 | 1/4 1/3 1/2 | 1/3 1/2 1 | 1/4 1/3 1/2 | 1/4 1/3 1/2 | 1/3 1/2 1 | 1/4 1/3 1/2 | 1/4 1/3 1/2 | 1/5 1/4 1/3 | 1/5 1/4 1/3 | 1 | 1 2 3 |
| **LULC** | 1/3 1/2 1 | 1/4 1/3 1/2 | 1/4 1/3 1/2 | 1/6 1/5 1/4 | 1/3 1/2 1 | 1/6 1/5 1/4 | 1/3 1/2 1 | 1/5 1/4 1/3 | 1/4 1/3 1/2 | 1/3 1/2 1 | 1/3 1/2 1 | 1 |

***DD= Drainage Density**

**CI=0.005**

**CR= 0.009**
