# Supplementary material for: Appraisal of Flood Susceptibility of Hooghly basin, India using Shannon Entropy (SE) and Fuzzy Analytical Hierarchy Process (FAHP)
Source: Research Square preprint supplement (doi:10.21203/rs.3.rs-3554111/v1), 2023-11-08
Supplement: Supplementary file 3 [file 440cf141a63aa666f3d94a45.docx]

**Table 2** Statistics of entropy weights

| **Conditioning factors** | **Classes** | **Class pixels** | **Class pixels (%)** | **Flood pixels** | **Flood pixels (%)** | **FR** | **SE** | | | |
| --- | --- | --- | --- | --- | --- | --- | --- | --- | --- | --- |
| **Pij** | **Eij** | **1-Eij** | **Wj (%)** |
| Drainage density | 0.02-0.18 | 1842 | 6.20 | 2221.00 | 5.41 | 0.87 | 0.17 | -0.13 | 1.663 | 0.090 |
| 0.19-0.24 | 3890 | 13.09 | 3331.50 | 8.11 | 0.62 | 0.12 | -0.11 |  |  |
| 0.25-0.29 | 8685 | 29.23 | 15547.01 | 37.84 | 1.29 | 0.26 | -0.15 |  |  |
| 0.30-0.34 | 10053 | 33.83 | 14436.51 | 35.13 | 1.04 | 0.21 | -0.14 |  |  |
| 0.35-0.45 | 5244 | 17.65 | 5552.50 | 13.51 | 0.77 | 0.15 | -0.12 |  |  |
| Elevation | 1-33 | 16361583 | 48.67 | 39044.00 | 95.02 | 1.95 | 0.98 | -0.01 | 1.132 | 0.061 |
| 33.01-72 | 5733945 | 17.06 | 2045.00 | 4.98 | 0.29 | 0.15 | -0.12 |  |  |
| 72.01-121 | 2843160 | 8.46 | 0 | 0 | 0 | 0 | 0 |  |  |
| 121.01-172 | 2568306 | 7.64 | 0 | 0 | 0 | 0 | 0 |  |  |
| 172.01-220 | 2821295 | 8.39 | 0 | 0 | 0 | 0 | 0 |  |  |
| 220.01-276 | 2142152 | 6.37 | 0 | 0 | 0 | 0 | 0 |  |  |
| 276.01-370 | 1083496 | 3.22 | 0 | 0 | 0 | 0 | 0 |  |  |
| 370.01-724 | 61371 | 0.18 | 0 | 0 | 0 | 0 | 0 |  |  |
| LULC | Water | 5787619 | 1.95 | 371.85 | 0.90 | 0.46 | 0.04 | -0.05 | 1.428 | 0.077 |
| Trees | 20789601 | 7.00 | 1673.30 | 4.07 | 0.58 | 0.05 | -0.06 |  |  |
| Flooded vegetation | 151740 | 0.05 | 185.92 | 0.45 | 8.86 | 0.74 | -0.10 |  |  |
| Crops | 203228392 | 68.43 | 32536.45 | 79.19 | 1.16 | 0.10 | -0.10 |  |  |
| Built area | 42737232 | 14.39 | 5763.60 | 14.03 | 0.97 | 0.08 | -0.09 |  |  |
| Clouds | 476598 | 0.16 | 0 | 0 | 0 | 0 | 0 |  |  |
| Rangeland | 23822058 | 8.02 | 557.77 | 1.36 | 0.17 | 0.01 | -0.03 |  |  |
| NDBI |  | 2982009 | 9.03 | 5949.58 | 14.48 | 1.60 | 0.32 | -0.16 | 1.695 | 0.092 |
|  | 6011389 | 18.21 | 10597.69 | 25.79 | 1.42 | 0.28 | -0.16 |  |  |
|  | 7335137 | 22.22 | 8552.52 | 20.81 | 0.94 | 0.19 | -0.14 |  |  |
|  | 8831216 | 26.75 | 10225.84 | 24.89 | 0.93 | 0.19 | -0.14 |  |  |
|  | 7857288 | 23.80 | 5763.66 | 14.03 | 0.59 | 0.12 | -0.11 |  |  |
| NDVI |  | 524920 | 1.59 | 0 | 0 | 0 | 0 | 0 | 1.601 | 0.087 |
|  | 9087890 | 27.52 | 9296.13 | 22.62 | 0.82 | 0.21 | -0.14 |  |  |
|  | 10385213 | 31.45 | 12270.89 | 29.86 | 0.95 | 0.24 | -0.15 |  |  |
|  | 8371927 | 25.36 | 10783.51 | 26.24 | 1.04 | 0.26 | -0.15 |  |  |
|  | 4647089 | 14.07 | 8738.36 | 21.27 | 1.51 | 0.38 | -0.16 |  |  |
| NDWI |  | 6678659 | 20.23 | 4648.06 | 11.31 | 0.56 | 0.11 | -0.11 | 1.689 | 0.091 |
|  | 8937823 | 27.07 | 9482.05 | 23.08 | 0.85 | 0.17 | -0.13 |  |  |
|  | 7568302 | 22.92 | 9296.13 | 22.62 | 0.99 | 0.20 | -0.14 |  |  |
|  | 6374074 | 19.31 | 11155.35 | 27.15 | 1.41 | 0.28 | -0.15 |  |  |
|  | 3458181 | 10.47 | 6507.29 | 15.84 | 1.51 | 0.30 | -0.16 |  |  |
| Population |  | 34175 | 91.30 | 34552.17 | 84.09 | 0.92 | 0.31 | -0.16 | 1.268 | 0.069 |
|  | 2868 | 7.66 | 6536.90 | 15.91 | 2.08 | 0.69 | -0.11 |  |  |
|  | 311 | 0.83 | 0 | 0 | 0 | 0 | 0 |  |  |
|  | 28 | 0.07 | 0 | 0 | 0 | 0 | 0 |  |  |
|  | 49 | 0.13 | 0 | 0 | 0 | 0 | 0 |  |  |
| Rainfall |  | 7407713 | 22.44 | 15989.34 | 38.91 | 1.73 | 0.43 | -0.16 | 1.545 | 0.084 |
|  | 10201017 | 30.90 | 11713.12 | 28.51 | 0.92 | 0.23 | -0.15 |  |  |
|  | 5436332 | 16.47 | 2231.07 | 5.43 | 0.33 | 0.08 | -0.09 |  |  |
|  | 8766506 | 26.56 | 11155.35 | 27.15 | 1.02 | 0.26 | -0.15 |  |  |
|  | 1199640 | 3.63 | 0 | 0 | 0 | 0 | 0 |  |  |
|  | 33011208 | 100.00 | 41088.88 | 100.00 | 4.01 | 1.00 | -0.55 |  |  |
| Distance to rivers |  | 11298336 | 34.23 | 18406.33 | 44.80 | 1.31 | 0.33 | -0.16 | 1.657 | 0.090 |
|  | 11609732 | 35.17 | 12642.73 | 30.77 | 0.87 | 0.22 | -0.14 |  |  |
|  | 6670844 | 20.21 | 7065.06 | 17.19 | 0.85 | 0.21 | -0.14 |  |  |
|  | 2759753 | 8.36 | 2788.84 | 6.79 | 0.81 | 0.20 | -0.14 |  |  |
|  | 670257 | 2.03 | 185.92 | 0.45 | 0.22 | 0.06 | -0.07 |  |  |
| Slope |  | 15407290 | 45.88 | 21752.94 | 52.94 | 1.15 | 0.38 | -0.16 | 1.441 | 0.078 |
|  | 13401176 | 39.91 | 17104.87 | 41.63 | 1.04 | 0.35 | -0.16 |  |  |
|  | 4194325 | 12.49 | 2231.07 | 5.43 | 0.43 | 0.14 | -0.12 |  |  |
|  | 427776 | 1.27 | 0 | 0 | 0 | 0 | 0 |  |  |
|  | 149239 | 0.44 | 0 | 0 | 0 | 0 | 0 |  |  |
| SPI |  | 14258005 | 43.26 | 15989.34 | 38.91 | 0.90 | 0.15 | -0.12 | 1.660 | 0.090 |
|  | 7910281 | 24.00 | 10411.66 | 25.34 | 1.06 | 0.18 | -0.13 |  |  |
|  | 7194669 | 21.83 | 10783.51 | 26.24 | 1.20 | 0.20 | -0.14 |  |  |
|  | 2968083 | 9.00 | 2602.92 | 6.33 | 0.70 | 0.12 | -0.11 |  |  |
|  | 630701 | 1.91 | 1301.46 | 3.17 | 1.66 | 0.28 | -0.15 |  |  |
| TWI |  | 12321313 | 37.38 | 12828.66 | 31.22 | 0.84 | 0.14 | -0.12 | 1.677 | 0.091 |
|  | 12128809 | 36.80 | 14873.80 | 36.20 | 0.98 | 0.16 | -0.13 |  |  |
|  | 5689136 | 17.26 | 9296.13 | 22.62 | 1.31 | 0.22 | -0.14 |  |  |
|  | 2325472 | 7.06 | 3160.68 | 7.69 | 1.09 | 0.18 | -0.13 |  |  |
|  | 497009 | 1.51 | 929.61 | 2.26 | 1.50 | 0.25 | -0.15 |  |  |
