# Supplementary material for: Appraisal of Flood Susceptibility of Hooghly basin, India using Shannon Entropy (SE) and Fuzzy Analytical Hierarchy Process (FAHP)
Source: Research Square preprint supplement (doi:10.21203/rs.3.rs-3554111/v1), 2023-11-08
Supplement: Supplementary file 4 [file 459813fe64ea8d39a0d242b7.docx]

**Table 4** area under different flood susceptibility classes

| **Factors** | **Shannon Entropy** | | **FAHP** | |
| --- | --- | --- | --- | --- |
| **Area (ha)** | **Area (%)** | **Area (ha)** | **Area (%)** |
| Very low | 497122.25 | 16.74 | 451671.54 | 15.21 |
| Low | 786030 | 26.47 | 778738.44 | 26.22 |
| Moderate | 655673.14 | 22.08 | 774768.59 | 26.09 |
| High | 642548.33 | 21.64 | 567283.25 | 19.10 |
| Very high | 388559.05 | 13.08 | 397470.95 | 13.38 |
| Total | 2969932.8 | 100 | 2969932.8 | 100 |
