# Supplementary material for: Appraisal of Flood Susceptibility of Hooghly basin, India using Shannon Entropy (SE) and Fuzzy Analytical Hierarchy Process (FAHP)
Source: Research Square preprint supplement (doi:10.21203/rs.3.rs-3554111/v1), 2023-11-08
Supplement: Supplementary file 5 [file 7fe3828291ba71ac60a17f3e.docx]

**Appendix 1**

| **Drainage Density** | **0.2 - 0.18** | **0.19 - 0.24** | **0.25 - 0.29** | **0.3 - 034** | **0.35 - 0.45** | **Fuzzy Geometric Mean** |
| --- | --- | --- | --- | --- | --- | --- |
| **0.2 - 0.18** | 1, 1, 1 | 1, 2, 3 | 2, 3, 4 | 5, 6, 7 | 5, 6, 7 | 2.19, 2.93, 3.58 |
| **0.19 - 0.24** | 1/3, 1/2, 1 | 1, 1, 1 | 3, 4, 5 | 3, 4, 5 | 5, 6, 7 | 1.72, 2.17, 2.81 |
| **0.25 - 0.29** | 1/3, 1/2, 1 | 1/5, 1/4, 1/3 | 1, 1, 1 | 3, 4, 6 | 5, 6, 7 | 1, 1.25, 1.69 |
| **0.3 - 034** | 1/3, 1/2, 1 | 1/5, 1/4, 1/3 | 1/5, 1/4, 1/3 | 1, 1, 1 | 5, 6, 7 | 0.58, 0.72, 0.95 |
| **0.35 - 0.45** | 1/3, 1/2, 1 | 1/5, 1/4, 1/3 | 1/7, 1/6, 1/5 | 1/7, 1/6, 1/5 | 1, 1, 1 | 0.25, 0.31, 0.42 |

| **Elevation** | **1 to 46** | **46.1 to 109** | **109.1 to 181** | **181.1 to 258** | **258.1 to 724** | **Fuzzy Geometric Mean** |
| --- | --- | --- | --- | --- | --- | --- |
| **1 to 46** | 1, 1, 1 | 4, 5, 6 | 2, 3, 4 | 2, 3, 4 | 1, 2, 3 | 1.74, 2.46, 3.10 |
| **46.1 to 109** | 1/6, 1/5, 1/4 | 1, 1, 1 | 2, 3, 4 | 1, 2, 3 | 1, 2, 3 | 0.80, 1.19, 1.55 |
| **109.1 to 181** | 1/4, 1/3, 1/2 | 1/5, 1/4, 1/3 | 1, 1, 1 | 2, 3, 4 | 1, 2, 4 | 0.63, 0.87, 1.21 |
| **181.1 to 258** | 1/4, 1/3, 1/3 | 1/3, 1/2, 1 | 1/3, 1/2, 1 | 1, 1, 1 | 1, 2, 5 | 0.49, 0.70, 1.11 |
| **258.1 to 724** | 1/4, 1/3, 1/4 | 1/3, 1/2, 1 | 1/3, 1/2, 1 | 1/3, 1/2, 1 | 1, 1, 1 | 0.39, 0.53, 0.76 |

| **LULC** | **Water** | **Trees** | **Flooded vegetation** | **Crops** | **Built area** | **Clouds** | **Rangelands** | **Fuzzy Geometric Mean** |
| --- | --- | --- | --- | --- | --- | --- | --- | --- |
| **Water** | 1, 1, 1 | 3, 4, 5 | 4, 5, 6 | 3, 4, 5 | 4, 5, 6 | 1, 1, 1 | 1, 1, 1 | 2.03, 2.35, 2.64 |
| **Trees** | 1/5, 1/4, 1/3 | 1, 1, 1 | 3, 4, 5 | 3, 4, 5 | 2, 3, 4 | 1, 1, 1 | 1, 2, 3 | 1.20, 1.43, 1.93 |
| **Flooded vegetation** | 1/5, 1/4, 1/3 | 1/6, 1/5, 1/4 | 1, 1, 1 | 4, 5, 6 | 2, 3, 4 | 1, 1, 1 | 1, 2, 3 | 0.83, 1.06, 1.34 |
| **Crops** | 1/5, 1/4, 1/3 | 1/5, 1/4, 1/3 | 1/5, 1/4, 1/3 | 1, 1, 1 | 2, 3, 4 | 1, 1, 1 | 1, 2, 3 | 0.55, 0.71, 0.89 |
| **Built area** | 1/5, 1/4, 1/3 | 1/4, 1/3, 1/2 | 1/4, 1/3, 1/2 | 1/6, 1/5, 1/4 | 1, 1, 1 | 1, 1, 1 | 1, 2, 3 | 0.41, 0.52, 0.67 |
| **Clouds** | 1, 1, 1 | 1, 1, 1 | 1, 1, 1 | 1, 1, 1 | 1, 1, 1 | 1, 1, 1 | 1, 2, 3 | 1, 1.10, 1.17 |
| **Rangelands** | 1/4, 1/3, 1/2 | 1/3, 1/2, 1 | 1/5, 1/4, 1/3 | 1/5, 1/4, 1/3 | 1/5, 1/4, 1/3 | 1, 1, 1 | 1, 1, 1 | 0.46, 0.43, 0.56 |

| **NDBI** | **-0.34 to -0.12** | **-0.11 to -0.06** | **-0.05 to -0.01** | **0 to 0.04** | **0.05 to 0.49** | **Fuzzy Geometric Mean** |
| --- | --- | --- | --- | --- | --- | --- |
| **-0.34 to -0.12** | 1, 1, 1 | 1, 2, 3 | 1, 2, 3 | 2, 3, 4 | 1, 2, 3 | 1.15, 1.89, 2.55 |
| **-0.11 to -0.06** | 1/3, 1/2, 1 | 1, 1, 1 | 1, 2, 3 | 2, 3, 4 | 1, 2, 3 | 0.92, 1.43, 2.05 |
| **-0.05 to -0.01** | 1/3, 1/2, 1 | 1/3, 1/2, 1 | 1, 1, 1 | 1, 2, 3 | 1, 2, 3 | 0.64, 1, 1.55 |
| **0 to 0.04** | 1/3, 1/2, 1 | 1/3, 1/2, 1 | 1/4, 1/3, 1/2 | 1, 1, 1 | 1/5, 1/4, 1/3 | 0.35, 0.46, 0.70 |
| **0.05 to 0.49** | 1/3, 1/2, 1 | 1/3, 1/2, 1 | 1/6, 1/5, 1/4 | 1/6, 1/5, 1/4 | 1, 1, 1 | 0.31, 0.40, 0.57 |

| **NDVI** | **-0.24 to 0.05** | **0.06 to 0.14** | **0.15 to 0.2** | **0.21 to 0.26** | **0.27 to 0.51** | **Fuzzy Geometric Mean** |
| --- | --- | --- | --- | --- | --- | --- |
| **-0.24 to 0.05** | 1, 1, 1 | 1, 2, 3 | 3, 4, 5 | 3, 4, 5 | 2, 3, 4 | 1.78, 2.49, 3.13 |
| **0.06 to 0.14** | 1/3, 1/2, 1 | 1, 1, 1 | 3, 4, 5 | 2, 3, 4 | 3, 4, 5 | 1.43, 1.89, 2.51 |
| **0.15 to 0.2** | 1/3, 1/2, 1 | 1/5, 1/4, 1/3 | 1, 1, 1 | 2, 3, 4 | 2, 3, 4 | 0.77, 1.02, 1.39 |
| **0.21 to 0.26** | 1/3, 1/2, 1 | 1/5, 1/4, 1/3 | 1/3, 1/2, 1 | 1, 1, 1 | 2, 3, 4 | 0.53, 0.72, 1.06 |
| **0.27 to 0.51** | 1/3, 1/2, 1 | 1/5, 1/4, 1/3 | 1/3, 1/2, 1 | 1/3, 1/2, 1 | 1, 1, 1 | 0.37, 0.50, 0.80 |

| **NDWI** | **-0.49 to -0.05** | **-0.04 to 0** | **0.01 to 0.05** | **0.06 to 0.12** | **0.13 to 0.34** | **Fuzzy Geometric Mean** |
| --- | --- | --- | --- | --- | --- | --- |
| **-0.49 to -0.05** | 1, 1, 1 | 1, 2, 3 | 1, 2, 3 | 1, 2, 3 | 1, 2, 3 | 1, 1.74, 2.41 |
| **-0.04 to 0** | 1/3, 1/2, 1 | 1, 1, 1 | 1, 2, 3 | 2, 3, 4 | 2, 3, 4 | 1.06, 1.55, 2.17 |
| **0.01 to 0.05** | 1/3, 1/2, 1 | 1/3, 1/2, 1 | 1, 1, 1 | 2, 3, 4 | 3, 4, 5 | 0.92, 1.25, 1.82 |
| **0.06 to 0.12** | 1/3, 1/2, 1 | 1/3, 1/2, 1 | 1/4, 1/3, 1/2 | 1, 1, 1 | 3, 4, 5 | 0.61, 0.80, 1.20 |
| **0.13 to 0.34** | 1/3, 1/2, 1 | 1/3, 1/2, 1 | 1/5, 1/4, 1/3 | 1/5, 1/4, 1/3 | 1, 1, 1 | 0.34, 0.44, 0.64 |

| **Population** | **0 - 1656.6** | **1656.7 - 8945.6** | **8945.7 - 27499.4** | **27499.5 - 50360.4** | **50360.5 - 84486.2** | **Fuzzy Geometric Mean** |
| --- | --- | --- | --- | --- | --- | --- |
| **0 - 1656.6** | 1, 1, 1 | 1, 2, 3 | 1, 2, 3 | 2, 3, 4 | 3, 4, 5 | 1.43, 2.17, 2.83 |
| **1656.7 - 8945.6** | 1/3, 1/2, 1 | 1, 1, 1 | 1, 2, 3 | 3, 4, 5 | 4, 5, 6 | 1.32, 1.82, 2.46 |
| **8945.7 - 27499.4** | 1/3, 1/2, 1 | 1/3, 1/2, 1 | 1, 1, 1 | 3, 4, 5 | 3, 4, 5 | 1, 1, 1.90 |
| **27499.5 - 50360.4** | 1/3, 1/2, 1 | 1/3, 1/2, 1 | 1/5, 1/4, 1/3 | 1, 1, 1 | 4, 5, 6 | 0.61, 0.79, 1.15 |
| **50360.5 - 84486.2** | 1/3, 1/2, 1 | 1/3, 1/2, 1 | 1/5, 1/4, 1/3 | 1/5, 1/4, 1/3 | 1, 1, 1 | 0.34, 0.44, 0.64 |

| **Rainfall** | **452.03 - 706.04** | **706.05 - 867.32** | **867.33 - 1028.6** | **1028.61 - 1173.75** | **1173.76 - 1480.19** | **Fuzzy Geometric Mean** |
| --- | --- | --- | --- | --- | --- | --- |
| **452.03 - 706.04** | 1, 1, 1 | 1, 2, 3 | 2, 3, 4 | 3, 4, 5 | 3, 4, 5 | 1.78, 2.49, 3.13 |
| **706.05 - 867.32** | 1/3, 1/2, 1 | 1, 1, 1 | 2, 3, 4 | 3, 4, 5 | 3, 4, 5 | 1.43, 1.89, 2.51 |
| **867.33 - 1028.6** | 1/3, 1/2, 1 | 1/3, 1/2, 1 | 1, 1, 1 | 4, 5, 6 | 4, 5, 6 | 1.74, 1.44, 2.05 |
| **1028.61 - 1173.75** | 1/3, 1/2, 1 | 1/4, 1/3, 1/2 | 1/5, 1/4, 1/3 | 1, 1, 1 | 4, 5, 6 | 0.58, 0.73, 1 |
| **1173.76 - 1480.19** | 1/3, 1/2, 1 | 1/4, 1/3, 1/2 | 1/5, 1/4, 1/3 | 1/6, 1/5, 1/4 | 1, 1, 1 | 0.31, 0.38, 0.53 |

| **Distance to rivers** | **0 - 2000** | **2001 - 4000** | **4001 - 6000** | **6001 - 8000** | **8001 - 10000** | **Fuzzy Geometric Mean** |
| --- | --- | --- | --- | --- | --- | --- |
| **0 - 2000** | 1, 1, 1 | 4, 5, 6 | 3, 4, 5 | 2, 3, 4 | 1, 2, 3 | 1.89, 2.61, 3.25 |
| **2001 - 4000** | 1/6, 1/5, 1/4 | 1, 1, 1 | 3, 4, 5 | 2, 3, 4 | 1, 2, 3 | 1, 1.37, 1.72 |
| **4001 - 6000** | 1/5, 1/4, 1/3 | 1/5, 1/4, 1/3 | 1, 1, 1 | 2, 3, 4 | 1, 2, 3 | 0.60, 0.82, 1.05 |
| **6001 - 8000** | 1/4, 1/3, 1/2 | 1/4, 1/3, 1/2 | 1/3, 1/2, 1 | 1, 1, 1 | 1, 2, 3 | 0.46, 0.64, 0.94 |
| **8001 - 10000** | 1/4, 1/3, 1/2 | 1/4, 1/3, 1/2 | 1/3, 1/2, 1 | 1/3, 1/2, 1 | 1, 1, 1 | 0.37, 0.49, 0.76 |

| **Slope** | **0 - 1.71** | **1.72 - 3.66** | **3.67 - 8.05** | **8.06 - 16.59** | **16.6 - 62.2** | **Fuzzy Geometric Mean** |
| --- | --- | --- | --- | --- | --- | --- |
| **0 - 1.71** | 1, 1, 1 | 3, 4, 5 | 3, 4, 5 | 2, 3, 4 | 3, 4, 5 | 2.22, 2.86, 3.47 |
| **1.72 - 3.66** | 1/5, 1/4, 1/3 | 1, 1, 1 | 3, 4, 5 | 2, 3, 4 | 3, 4, 5 | 1.29, 1.64, 2.01 |
| **3.67 - 8.05** | 1/5, 1/4, 1/3 | 1/5, 1/4, 1/3 | 1, 1, 1 | 2, 3, 4 | 2, 3, 4 | 0.69, 0.89, 1.12 |
| **8.06 - 16.59** | 1/3, 1/2, 1 | 1/4, 1/3, 1/2 | 1/4, 1/3, 1/2 | 1, 1, 1 | 2, 3, 4 | 0.53, 0.70, 1 |
| **16.6 - 62.2** | 1/3, 1/2, 1 | 1/4, 1/3, 1/2 | 1/3, 1/2, 1 | 1/3, 1/2, 1 | 1, 1, 1 | 0.39, 0.53, 0.87 |

| **SPI** | **-6.91 to -5.06** | **-5.05 to -2.29** | **-2.28 to -0.02** | **-0.01 to 3.51** | **3.52- 14.52** | **Fuzzy Geometric Mean** |
| --- | --- | --- | --- | --- | --- | --- |
| **-6.91 to -5.06** | 1, 1, 1 | 1, 2, 3 | 1, 2, 3 | 1, 2, 3 | 2, 3, 4 | 1.15, 1.89, 2.55 |
| **-5.05 to -2.29** | 1/3, 1/2, 1 | 1, 1, 1 | 1, 2, 3 | 1, 2, 3 | 2, 3, 4 | 0.92, 1.43, 2.05 |
| **-2.28 to -0.02** | 1/3, 1/2, 1 | 1/3, 1/2, 1 | 1, 1, 1 | 1, 2, 3 | 3, 4, 5 | 0.80, 1.15, 1.72 |
| **-0.01 to 3.51** | 1/3, 1/2, 1 | 1/3, 1/2, 1 | 1/3, 1/2, 1 | 1, 1, 1 | 3, 4, 5 | 0.64, 0.82, 1.38 |
| **3.52- 14.52** | 1/3, 1/2, 1 | 1/3, 1/2, 1 | 1/4, 1/3, 1/2 | 1/4, 1/3, 1/2 | 1, 1, 1 | 0.37, 0.49, 0.76 |

| **TWI** | **2.94 to 7.26** | **7.27 to 8.89** | **8.9 to 11.09** | **11.1 to 14.67** | **14.68- 23.72** | **Fuzzy Geometric Mean** |
| --- | --- | --- | --- | --- | --- | --- |
| **2.94 to 7.26** | 1, 1, 1 | 1, 2, 3 | 1, 2, 3 | 3, 4, 5 | 3, 4, 5 | 1.55, 2.30, 2.95 |
| **7.27 to 8.89** | 1/3, 1/2, 1 | 1, 1, 1 | 1, 2, 3 | 3, 4, 5 | 4, 5, 6 | 1.32, 1.82, 2.47 |
| **8.9 to 11.09** | 1/4, 1/3, 1/2 | 1/3, 1/2, 1 | 1, 1, 1 | 4, 5, 6 | 4, 5, 6 | 1.06, 1.33, 1.78 |
| **11.1 to 14.67** | 1/5, 1/4, 1/3 | 1/4, 1/3, 1/2 | 1/5, 1/4, 1/3 | 1, 1, 1 | 4, 5, 6 | 0.53, 0.63, 0.80 |
| **14.68- 23.72** | 1/4, 1/3, 1/2 | 1/4, 1/3, 1/2 | 1/6, 1/5, 1/4 | 1/6, 1/5, 1/4 | 1, 1, 1 | 0.28, 0.34, 0.44 |
