# Supplementary material for: Appraisal of Flood Susceptibility of Hooghly basin, India using Shannon Entropy (SE) and Fuzzy Analytical Hierarchy Process (FAHP)
Source: Research Square preprint supplement (doi:10.21203/rs.3.rs-3554111/v1), 2023-11-08
Supplement: Supplementary file 6 [file cb6a5d52a4546e6357af06d9.docx]

**Table 5** Binary Logistic showing factors influencing Shannon Entropy and FAHP based flood susceptibility analysis

| **Variables** | **Shannon Entropy** | | | | **FAHP** | | | |
| --- | --- | --- | --- | --- | --- | --- | --- | --- |
| **P value** | **Odds Ratio** | **95% CI. for EXP(B)** | | **P value** | **Odds Ratio** | **95% CI. for EXP(B)** | |
| **Lower** | **Upper** | **Lower** | **Upper** |
| Drainage density | .000* | 1.204 | 2.996 | 4.842 | .000* | 4.99 | 2.138 | 1.164 |
| Elevation | .018* | 1.026 | 1.005 | 1.049 | .001* | 1.054 | 1.021 | 1.088 |
| LULC | .039* | 1.411 | 1.018 | 1.957 | .177 | 1.247 | 0.905 | 1.717 |
| NDBI | 0.156 | 0 | 0 | 29.503 | .016* | 0 | 0 | 0.049 |
| NDVI | 0.718 | 8.385 | 0 | 8.636 | .685 | 0.074 | 0 | 2.198 |
| Population density | 0.173 | 1 | 1 | 1.001 | .572 | 1 | 1 | 1.001 |
| Rainfall | .000* | 1.015 | 1.011 | 1.02 | .000* | 1.011 | 1.008 | 1.015 |
| Distance to rivers | .000* | 1.001 | 1 | 1.001 | .002* | 1 | 1 | 1.001 |
| Slope | 0.89 | 1.034 | 0.639 | 1.674 | .299 | 0.803 | 0.53 | 1.215 |
| SPI | 0.304 | 0.885 | 0.701 | 1.117 | .598 | 1.059 | 0.855 | 1.311 |
| TWI | 0.54 | 1.105 | 0.802 | 1.523 | .930 | 1.014 | 0.743 | 1.384 |

*=0.05 (95%) level of significance
